# Supplementary material
Source: Copernicus journal article supplement (doi:10.5194/acp-26-4711-2026)
Supplement: Supplementary file 1 [file acp-26-4711-2026-supplement.pdf]

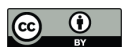

*Supplement of*

## **Rapid formation of secondary aerosol precursors from the autoxidation of C<sub>5</sub>–C<sub>8</sub> n-aldehydes**

**Shawon Barua et al.**

*Correspondence to:* Shawon Barua ([shawon.barua@tuni.fi](mailto:shawon.barua@tuni.fi)) and Matti Rissanen ([matti.rissanen@tuni.fi](mailto:matti.rissanen@tuni.fi))

The copyright of individual parts of the supplementary might differ from the article licence.

## 1 S1. Flow reactor setup and mass spectrometry

2 A schematic of the flow reactor setup used in *n*-aldehyde OH oxidation reactions is shown in  
3 Figure S1. All the reactant gas supply lines were connected to the reactor via PTFE tubing and  
4 Swagelok fittings. The gas flows were controlled by Alicat mass flow controllers (MFC). The  
5 mass spectrometer chemical ionization inlet flow (8–10 slpm) and the volume of the reactor  
6 defines the reaction time of the gas mixture inside the reactor. A 100 cm long borosilicate flow  
7 reactor with 4.7 cm inner diameter (i.d.) was used for long reaction time experiments while a  
8 quartz flow reactor (length: 100 cm, and i.d.: 2.2 cm) was used for the short reaction time  
9 experiments. Short reaction time experiments were achieved by providing the precursor VOC  
10 flow via a movable injector tube within the reactor and adjusting the distance of the injector tip  
11 with respect to the mass spectrometer orifice. The deuterated water (D<sub>2</sub>O) line and the NO line  
12 were connected separately only during the hydrogen to deuterium (H/D) exchange experiment  
13 and the oxidation experiment in presence of NO, respectively.

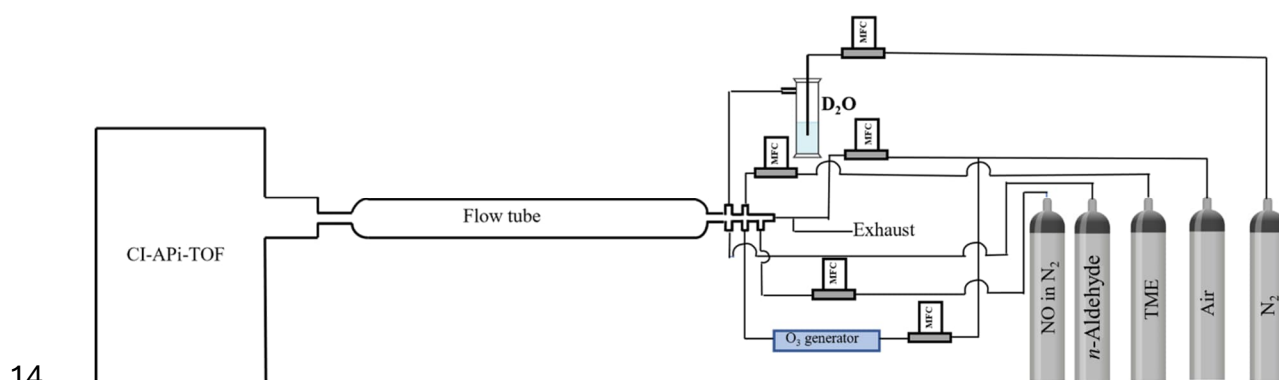

15 Figure S1. A nitrate (NO<sub>3</sub><sup>-</sup>) based chemical ionization mass spectrometer coupled to ambient  
16 pressure flow reactor. TME = tetramethylethylene (C<sub>6</sub>H<sub>12</sub>). The oxidant OH radical was  
17 produced in situ by TME + O<sub>3</sub> reaction. MFC = mass flow controller. CI-APi-TOF = chemical  
18 ionization atmospheric pressure interface time-of-flight mass spectrometer.

19 The initial concentrations of VOC, TME, and NO in the gas stream were calculated by using  
20 equation:

21

$$[X] = \frac{\text{measured flow}_x}{\text{measured flow}_t} \times [MR]$$

22 where species X can be a VOC, TME, or NO. Here, *measured flow<sub>x</sub>* and *measured flow<sub>t</sub>*  
23 denote the measured flow of the species X and the measured total flow of the gas stream,  
24 respectively, while MR is the mixing ratio of the species X in the gas cylinder. On the other  
25 hand, the time profiles of VOC, O<sub>3</sub>, NO, etc. were estimated from kinetic simulation model

26 discussed in Section S13 below. The average concentrations of OH, and initial RO<sub>2</sub> radicals  
27 under different reaction conditions are given in Table S1.

28 The mass spectrometric data processing, including averaging, mass axis calibration, and peak  
29 integration were done using the tofTools v6.03 package for MATLAB. The signal intensities  
30 of all the detected species were normalized using the following expression:

$$31 \quad S = \frac{[X * NO_3^-]}{[NO_3^-] + [HNO_3NO_3^-] + [(HNO_3)_2NO_3^-]}$$

32  
33 where  $[X * NO_3^-]$  represents the intensity of an individual species X as NO<sub>3</sub><sup>-</sup> adduct. In the  
34 denominator,  $[NO_3^-]$ ,  $[HNO_3NO_3^-]$ , and  $[(HNO_3)_2NO_3^-]$  represent the intensities of reagent  
35 ion monomer, dimer, and trimer, respectively.

36 We determined the calibration coefficient for our nitrate chemical ionization mass spectrometer  
37 (NO<sub>3</sub><sup>-</sup>-CIMS) to be  $2.0 \times 10^9$  molecule/cm<sup>3</sup>/ncps by calibrating the instrument for sulfuric  
38 acid using the method shown by Kürten et al. (2012). A detection limit (LOD) of  $2.82 \times 10^3$   
39 molecules/cm<sup>3</sup> for sulfuric acid was determined using the equation below.

$$40 \quad LOD = \frac{3.3 \times \sigma}{S}$$

41 Here,  $S$  is the slope of the calibration curve and  $\sigma$  is the standard deviation of the responses of  
42 blank measurements. The HOMs were quantified based on the assumption that they are charged  
43 as efficiently as sulfuric acid. The concentrations of the oxidation products including HOMs  
44 were calculated by multiplying the individual normalized product signals with the calibration  
45 coefficient. The same calibration coefficient was commonly used for all oxidation products  
46 because of lack of methods that can account for differences in sensitivity across various  
47 oxygenated products. Then, the yields of the products were estimated by dividing their  
48 concentrations with the concentration of consumed precursor VOC (i.e.,  $Y_{HOM} = \Delta HOM / \Delta VOC$ ). Also, note that the flow reactor system exhibits unavoidable wall loss of  
49 reactive and condensable species, which contributes to the overall uncertainty in the  
50 experimental yields. The normal uncertainty range with the measurement technique has been  
51 assumed as asymmetric -50% to +100% (about a factor of two).

## 53 **S2. Chemicals**

54 High purity Nitrogen gas (5.0 grade) was obtained from Woikoski and Linde Oy. The NO gas  
55 cylinder (100 ppm in N<sub>2</sub>) was obtained from Air Products. Deuterium oxide (99.9 atom % D)

56 was obtained from Sigma Aldrich and was transferred to the flow reactor by bubbling nitrogen  
57 gas through a liquid D<sub>2</sub>O reservoir. The following chemicals were used to make individual gas  
58 cylinders diluted in N<sub>2</sub>: Tetramethylethylene (98%), hexanal (98%), heptanal (Supelco, purity  
59  $\geq 97.0\%$ ), and octanal (99%) all from Sigma Aldrich while pentanal (97%) was obtained from  
60 Acros Organics. All the chemicals were used without further purification.

### 61 S3. *n*-Heptanal ozonolysis background

62 In the OH initiated oxidation experiment of *n*-heptanal, we used exceptionally low precursor  
63 concentrations compared to other studied *n*-aldehydes (see Table 1 in the main manuscript).  
64 This was done to reduce the *n*-heptanal ozonolysis background signals originating from  
65 unknown contaminants from the heptanal cylinder. The ozonolysis background signals with  
66 high and low precursor conditions are shown in Figure S2. Under low precursor condition, we  
67 avoid the interference of these background signals with the heptanal OH oxidation products.  
68 Figure S2 clearly shows that the heptanal ozonolysis background signals are distinct from the  
69 heptanal OH oxidation product signals, C<sub>7</sub>H<sub>12</sub>O<sub>4</sub> (m/z 222), C<sub>7</sub>H<sub>12-14</sub>O<sub>5</sub> (m/z 238–240), C<sub>7</sub>H<sub>12-14</sub>  
70 O<sub>6</sub> (m/z 254–256), C<sub>7</sub>H<sub>12-14</sub>O<sub>7</sub> (m/z 270–272), C<sub>7</sub>H<sub>12-14</sub>O<sub>8</sub> (m/z 286–288), C<sub>14</sub>H<sub>26</sub>O<sub>9</sub> (m/z  
71 400), C<sub>14</sub>H<sub>26</sub>O<sub>10</sub> (m/z 416), and C<sub>14</sub>H<sub>26</sub>O<sub>11</sub> (m/z 432) that are shown in Figure 3 in the main  
72 manuscript.

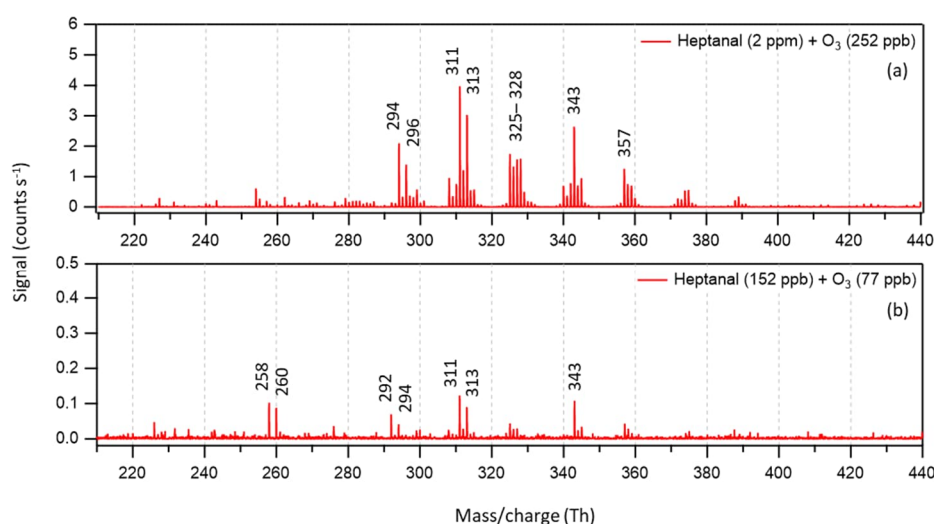

73  
74 Figure S2. Heptanal + ozone background spectra measured with different reactant  
75 concentrations: high (a), and low (b). The unidentified products likely originate from a heptanal  
76 stabilizer added by the chemical supplier. Note: Heptanal oxidation experiment initiated by OH  
77 radicals (see Figure 3 in the main manuscript) was conducted using the same concentrations of  
78 heptanal and ozone as condition (b) and with the addition of TME (as the source of OH).

#### 79 S4. TME ozonolysis and aldehyde background spectra

80 To ensure that the *n*-aldehyde + OH oxidation products shown in Figures 2, 3, 5, and 7 of the  
81 main manuscript are either distinct or significantly bigger than any background signals, we  
82 record all the possible background spectra separately. Figure S3 clearly shows that there are  
83 some persistent background signals with nominal mass/charge 226 (panels b–c), 276 (panels  
84 b–c), 283 (panel a), 292 (panels a–d), 412 (panels c–d), 440 (panels a and d), etc. present. While  
85 most of them are distinct from the nominal mass/charge ratios of the products signals in *n*-  
86 aldehyde oxidation, a few of them match with the oxidation products (e.g.,  $m/z$  226 with  
87  $C_5H_8O_6$  and  $C_6H_{12}O_5$ ,  $m/z$  342 with  $C_{11}H_{20}O_8$ , and  $m/z$  412 with  $C_{16}H_{30}O_8$ ). Therefore, the  
88 backgrounds of TME ozonolysis (TME +  $O_3$ ) and relevant aldehyde are subtracted from the  
89 spectra reported in the main manuscript (Figures 2, 3, and 7) for clarity and thus it ensures that  
90 the reported product signals are produced exclusively during the oxidation of *n*-aldehydes.

91

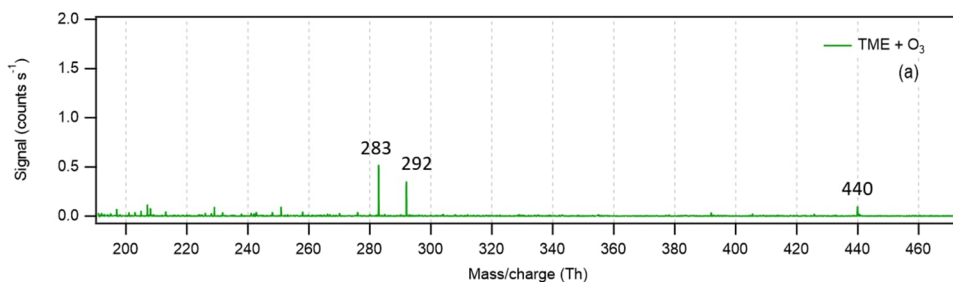

92

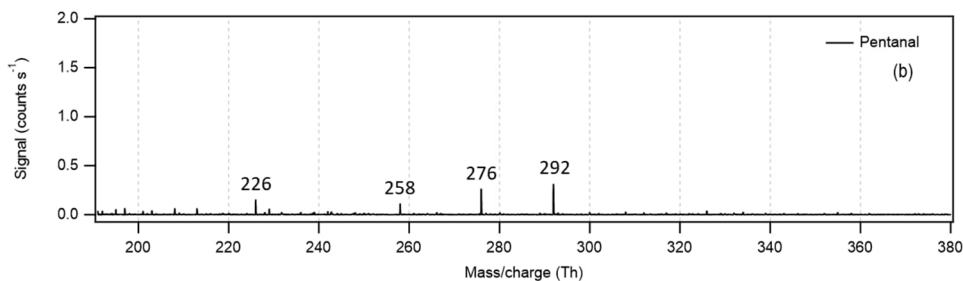

93

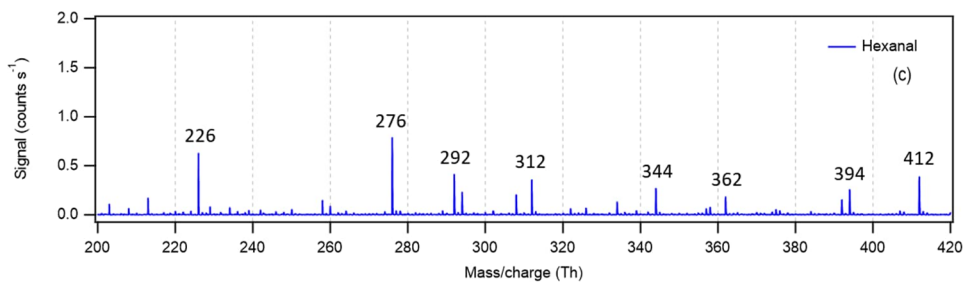

94

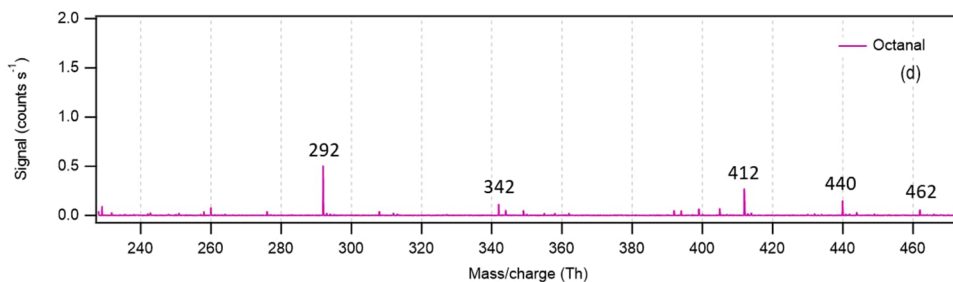

95 Figure S3: Individual background spectra of TME + O<sub>3</sub> (a), pentanal (b), hexanal (c), and  
96 octanal (d) recorded during *n*-aldehyde OH oxidation experiments. The reaction of TME + O<sub>3</sub>  
97 is the source of the oxidant OH.

## 98 S5. Instrument's responses to changes in reactant flows

99 The mass spectrometer that used for detecting the oxidation products in different *n*-aldehyde  
100 experiments is very sensitive to the changes in reactant gas flow conditions. Figure S4 shows  
101 one minute average time series of several product signals that show responses of the detected  
102 signals increasing or decreasing depending on how the reactant gas flows are controlled. In  
103 Figure S4A, we can see that the reagent ion dimer HNO<sub>3</sub>NO<sub>3</sub><sup>-</sup> drops immediately with the  
104 introduction of D<sub>2</sub>O in the flow reactor and raises back with the withdrawal of the D<sub>2</sub>O flow.  
105 The opposite trend is seen with the corresponding deuterated reagent dimer ion signal  
106 DNO<sub>3</sub>NO<sub>3</sub><sup>-</sup>. The product signal of C<sub>6</sub>H<sub>10</sub>O<sub>6</sub> gets exchanged with two D atoms and the  
107 corresponding C<sub>6</sub>H<sub>8</sub>D<sub>2</sub>O<sub>6</sub> shows a similar trend as shown in the bottom part of Figure S4A.  
108 When the precursor VOC (hexanal) flow is set to zero, the signal of C<sub>6</sub>H<sub>10</sub>O<sub>6</sub> gets dropped  
109 completely. In Figure S4B, we can see how the octanal derived dominant C<sub>8</sub>H<sub>15</sub>O<sub>6</sub> radical  
110 signal responds with various NO flows. It shows a general decreasing trend with the increase  
111 of NO concentrations. On the other hand, the corresponding organonitrate C<sub>8</sub>H<sub>15</sub>O<sub>6</sub>NO signal  
112 raises with up to 200 ppb of NO and then drops with higher NO concentrations.

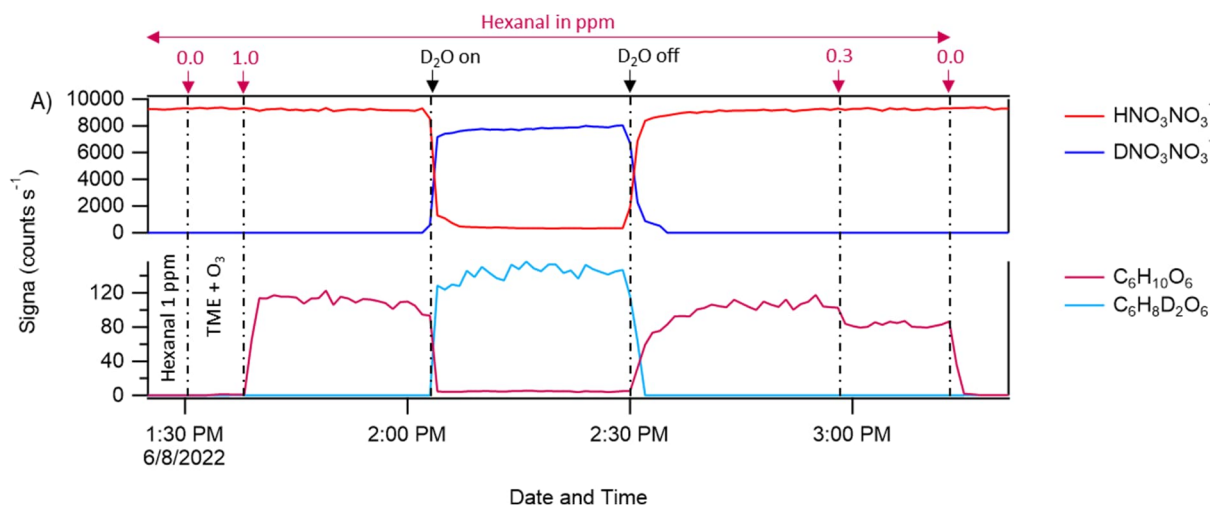

113

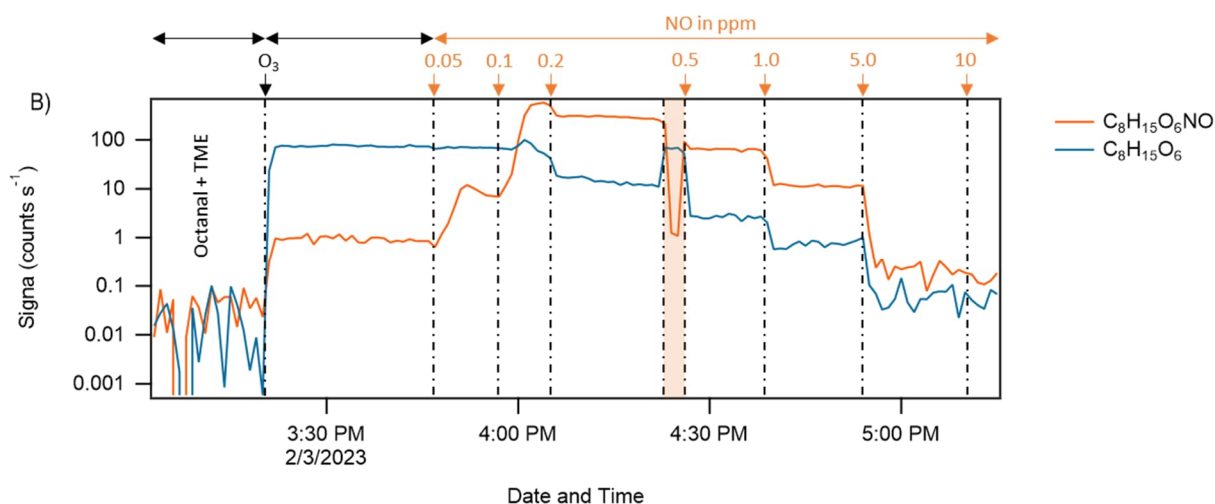

114  
 115 Figure S4. Time series of detected product signals with the changes in different reactant gas  
 116 flows in OH initiated oxidation of hexanal (A) and octanal (B). The product signals are labelled  
 117 with the exclusion of  $\text{NO}_3^-$  ion attachment in their compositions. Panel (A) shows that with the  
 118 introduction of  $\text{D}_2\text{O}$  in the reaction mixture, labile H atoms in the reagent ion (top part) and in  
 119 the oxidation product (bottom part) are exchanged with D atoms and the corresponding signals  
 120 drop and raise accordingly. Panel (B) shows the responses of dominant  $\text{C}_8\text{H}_{15}\text{O}_6$  radical and  
 121 corresponding organonitrate  $\text{C}_8\text{H}_{15}\text{O}_6\text{NO}$  with various NO flows. The shaded area in panel (B)  
 122 indicates switching of NO mass flow controllers from smaller range to higher range.

### 123 S6. Autoxidation an aldehyde – hexanal

124 The oxidation reaction of an aldehyde by OH radical is initiated predominantly by the  
 125 abstraction of the aldehydic hydrogen on C1. The H abstraction can also take place on other  
 126 carbons (e.g., C4) distant from the aldehydic moiety (see Figure S5 below adapted from Barua  
 127 et al. (2023)). Both reaction channels produce a carbon centred radical that can add molecular  
 128 oxygen atoms and form acyl (or alkyl) peroxy radicals ( $\text{RC}(\text{O})\text{O}_2$  or  $\text{RO}_2$ ) which can  
 129 subsequently autoxidize to form highly oxygenated organic molecules (HOMs). Figure S5  
 130 shows that the autoxidation of hexanal along C1 and C4 channels with initial branching of 86%  
 131 and 8%, respectively, produce the same  $\text{O}_5$   $\text{RO}_2$  (A61) as the dominant reaction intermediate.  
 132 The A61 radical slowly turns over to  $\text{O}_7$   $\text{RO}_2$  (A61a) via subsequent reactions along the  
 133 autoxidation path. The other *n*-aldehydes (e.g., pentanal–octanal) are likely to undergo similar  
 134 autoxidation mechanism and form HOMs we observed experimentally as shown in the main  
 135 manuscript.

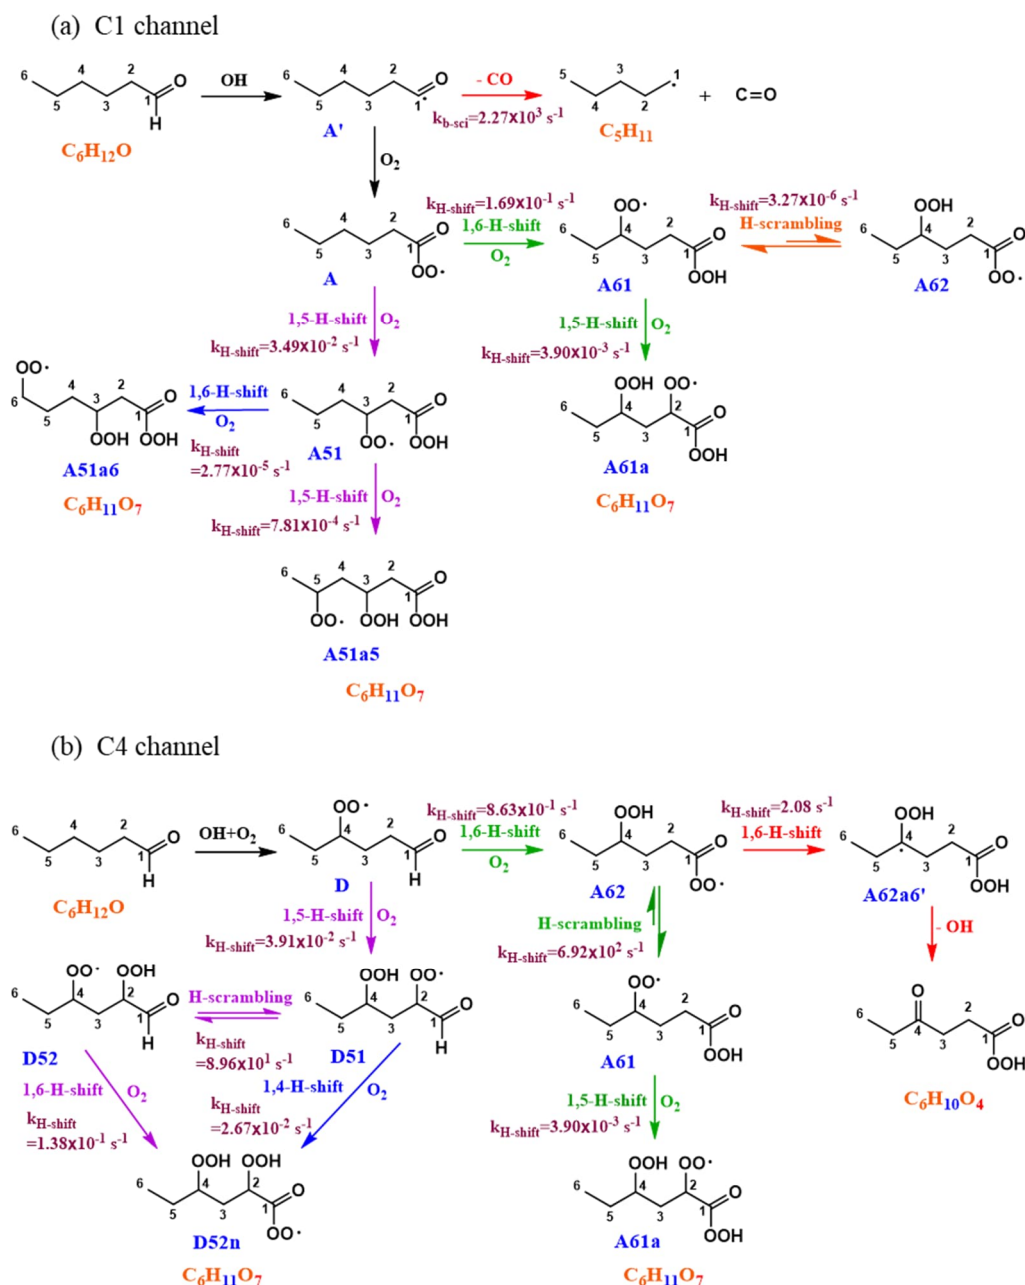

136

137 Figure S5. Autoxidation mechanism of hexanal + OH reaction initiated by H atom abstraction  
 138 from the aldehydic carbon (a) and from a non-aldehydic carbon (b) forming O<sub>7</sub> HOM shown  
 139 by Barua et al. (2023). Along the dominant aldehydic H abstraction channel (branching ratio  
 140 86%), the formation of O<sub>5</sub> product (A61) is very fast and the subsequent H-shift reaction is  
 141 relatively slower. The non-aldehydic H abstraction channel (branching ratio 8%) shows a  
 142 slower production of O<sub>5</sub> product (D52) compared to A61, which subsequently undergoes a fast  
 143 H-shift reaction.

144 **S7. Autoxidation forming O<sub>9</sub> HOM in *n*-aldehydes**

145 With the increase of carbon chain length in the studied *n*-aldehyde oxidation experiments, we  
 146 observed the formation of more oxygenated products with up to a O<sub>9</sub> monomeric HOM in the  
 147 case of octanal. In Figure S6, the autoxidation mechanism originated from hexanal work (see  
 148 Figure S5 above) is extended to HOM up to 9 oxygen atoms. The autoxidation generated radical  
 149 intermediates (C<sub>n</sub>H<sub>2n-1</sub>O<sub>7,9</sub>) can also undergo chain termination reactions forming closed-shell  
 150 products via OH loss, via Russell mechanism forming an alcohol and a carbonyl species (red  
 151 arrows in Figure S6), and H abstraction from HO<sub>2</sub> radicals (RO<sub>2</sub> + HO<sub>2</sub> → ROOH + O<sub>2</sub>).

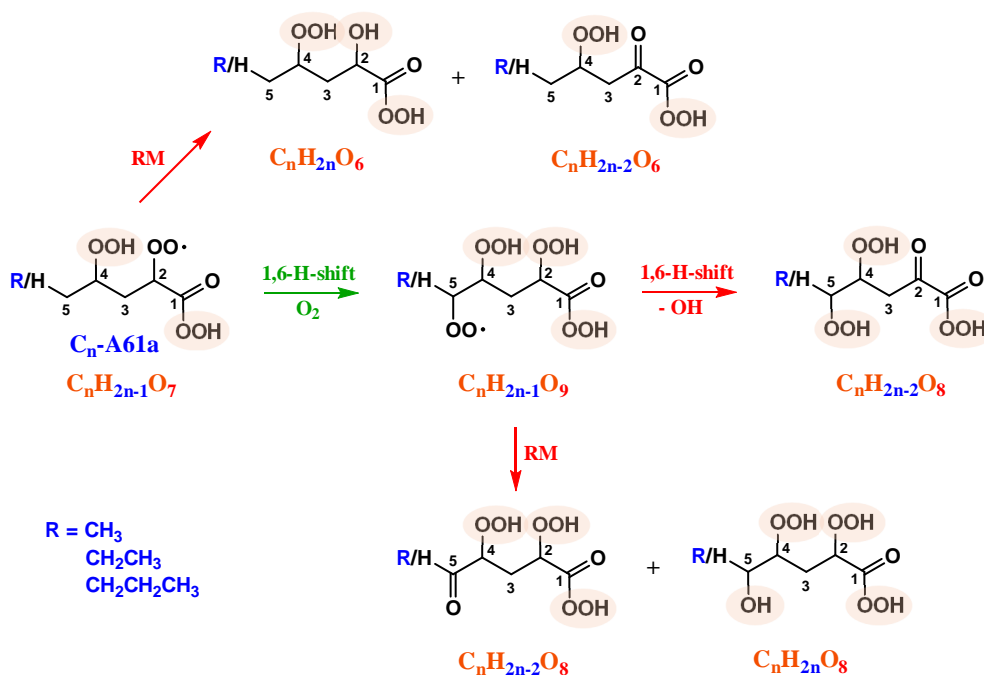

152

153 Figure S6. Autoxidation mechanism of *n*-aldehyde + OH reaction extended from Figure S5,  
 154 showing the formation of HOM up to O<sub>9</sub> (green arrow) along with reaction chain termination  
 155 products (red arrows). RM = Russell mechanism (RO<sub>2</sub> + R'O<sub>2</sub> → ROH + R'-HC=O + O<sub>2</sub>).

## 156 S8. Bimolecular reaction products

157 This section describes potential reaction mechanisms leading to the identified products which  
158 involve one RO<sub>2</sub> bimolecular reaction step forming alkoxy radical (RO) intermediates (RO<sub>2</sub> +  
159 RO<sub>2</sub> → 2 RO + O<sub>2</sub>). While considering H-shift reactions in the alkoxy radicals (C<sub>n</sub>H<sub>2n-1</sub>O<sub>4</sub>),  
160 progressively longer H-shift span (from 1,4 H-shift in C<sub>5</sub>H<sub>9</sub>O<sub>4</sub> to 1,6 H-shift in C<sub>8</sub>H<sub>15</sub>O<sub>4</sub>, see  
161 Figures S7–S10) becomes more relevant (Vereecken and Peeters, 2010) as the carbon chain  
162 length of the precursor aldehyde increases. The alkoxy radical can also undergo H-scrambling  
163 reaction with the peroxy acid group (Yang et al., 2024) forming hydroxyl acylperoxy radical  
164 (see Figure S11 below). These mechanisms show the most probable formation paths of  
165 dominant O<sub>6</sub> alkyl peroxy radicals (C<sub>n</sub>H<sub>2n-1</sub>O<sub>6</sub>) we observed in the studied C<sub>5</sub>–C<sub>8</sub> *n*-aldehyde  
166 oxidation during short reaction time experiments (see Figure 2 in the main manuscript). In the  
167 case of heptanal and octanal in Figures S9–S10, we show the reaction chain propagation  
168 forming C<sub>n</sub>H<sub>2n-1</sub>O<sub>8</sub> radicals (green arrows) that we observed experimentally (see Figure 3 in  
169 the main manuscript). Besides, the likely formation of the closed-shell O<sub>5</sub> and O<sub>6</sub> products  
170 originating from C<sub>n</sub>H<sub>2n-1</sub>O<sub>6</sub> radicals are also shown in Figures S7–S11. In the molecular  
171 structures, the labile hydrogen containing groups are marked in light-brown shapes. The  
172 structures associated with the proposed mechanisms are in agreement with the hydrogen to  
173 deuterium (H to D) exchange experiments (see Figure 7 in the main manuscript).

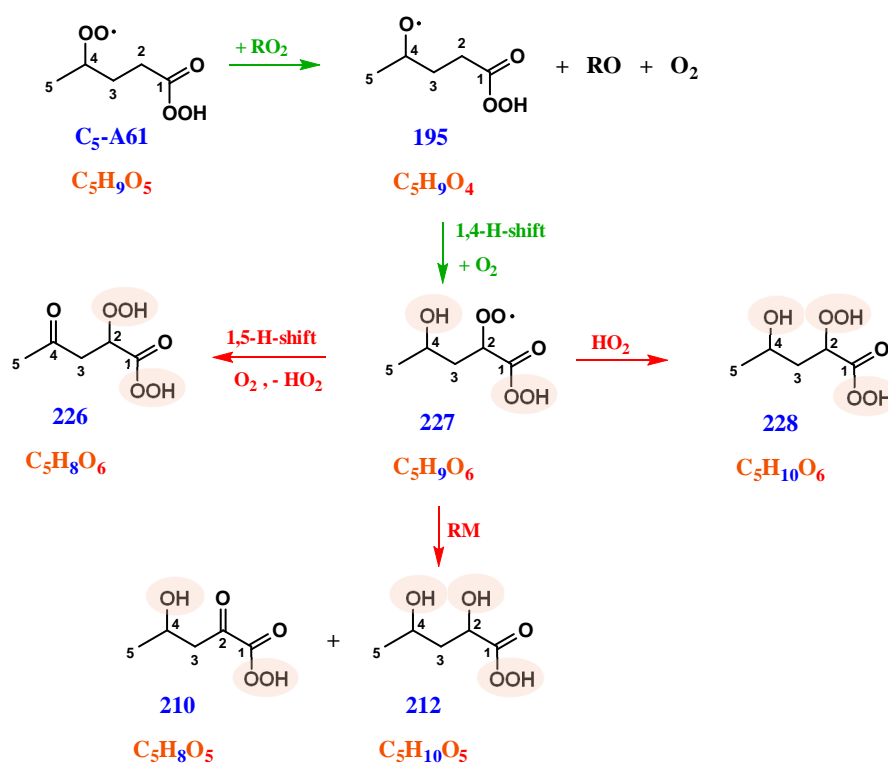

174

175 Figure S7. Formation of C<sub>5</sub>H<sub>8-10</sub>O<sub>6</sub> products in pentanal + OH reaction likely involve C<sub>5</sub>-A61  
 176 (C<sub>5</sub>H<sub>9</sub>O<sub>5</sub>) peroxy radical undergoing bimolecular reactions with other peroxy radicals (RO<sub>2</sub>).  
 177 The C<sub>5</sub>H<sub>9</sub>O<sub>6</sub> (nominal mass 227) radical likely undergo Russell mechanism (RM: RO<sub>2</sub> + R'O<sub>2</sub>  
 178 → ROH + R'-<sub>H</sub>C=O + O<sub>2</sub>) forming closed-shell O<sub>5</sub> products.

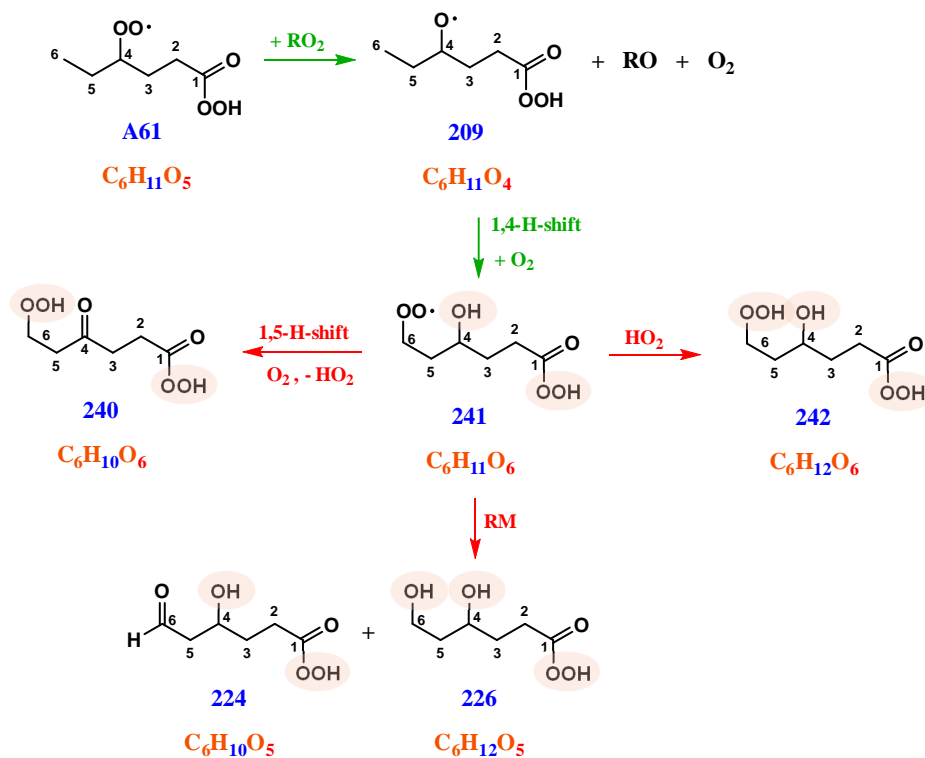

179

180 Figure S8. Formation of C<sub>6</sub>H<sub>10-12</sub>O<sub>6</sub> products in hexanal + OH reaction likely involve A61  
 181 (C<sub>6</sub>H<sub>11</sub>O<sub>5</sub>) peroxy radical undergoing bimolecular reactions with other peroxy radicals (RO<sub>2</sub>).  
 182 The C<sub>6</sub>H<sub>11</sub>O<sub>6</sub> (nominal mass 241) radical likely undergo Russell mechanism (RM: RO<sub>2</sub> + R'O<sub>2</sub>  
 183 → ROH + R'-<sub>H</sub>C=O + O<sub>2</sub>) forming closed-shell O<sub>5</sub> products.

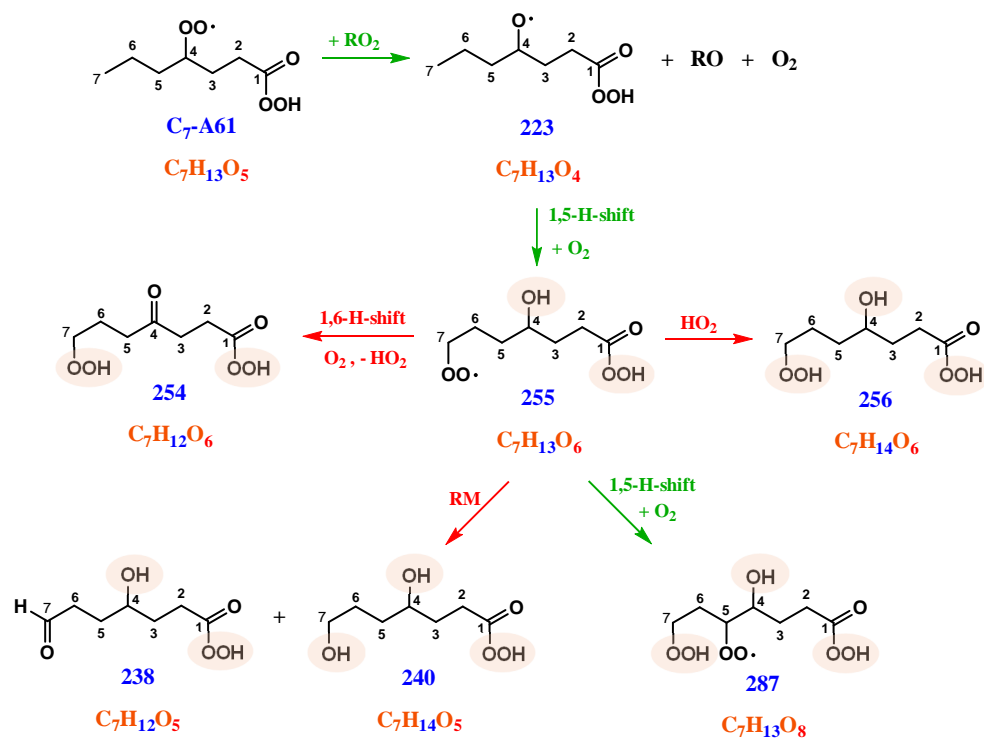

184

185 Figure S9. Formation of  $C_7H_{12-14}O_6$  products in heptanal + OH reaction likely involve  $C_7\text{-A61}$   
 186 ( $C_7H_{13}O_5$ ) peroxy radical undergoing bimolecular reactions with other peroxy radicals ( $RO_2$ ).  
 187 The  $C_7H_{13}O_6$  (nominal mass 255) radical can propagate autoxidation forming  $C_7H_{13}O_8$   
 188 ( $C_7H_{13}O_8$ ) radical (green arrow). It can also undergo Russell mechanism (RM:  $RO_2$   
 189 +  $R'O_2 \rightarrow ROH + R'_H C=O + O_2$ ) forming closed-shell  $O_5$  products.

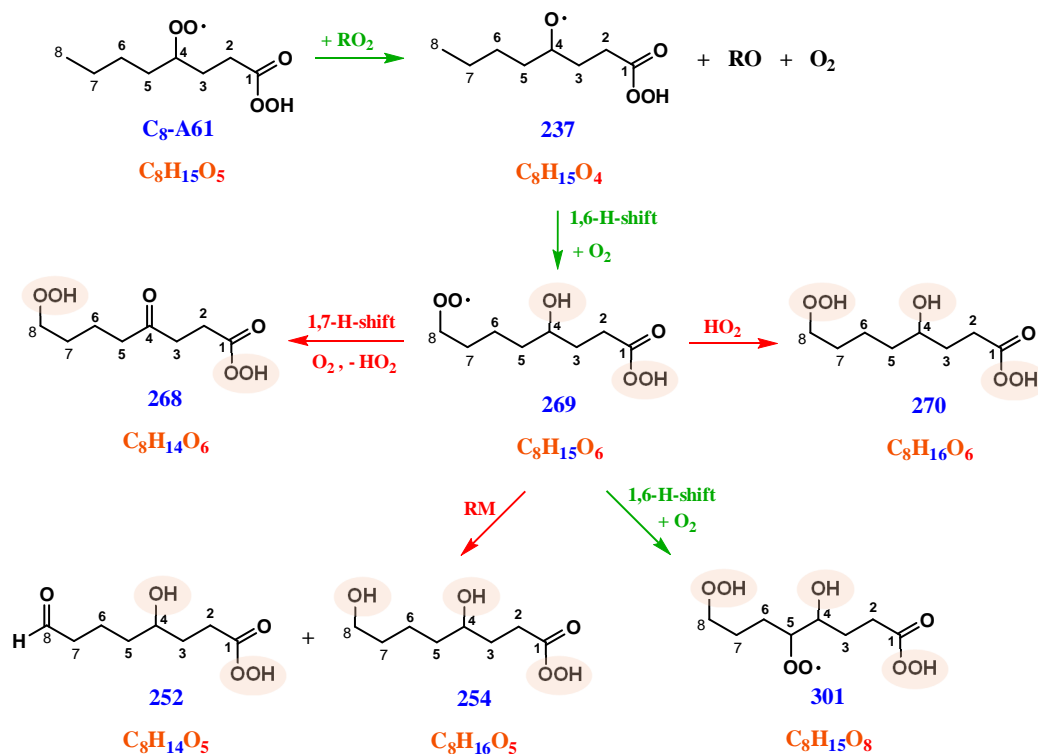

190

191 Figure S10. Formation of  $C_8H_{14-16}O_6$  products in octanal + OH reaction likely involve  $C_8$ -A61  
 192 ( $C_8H_{15}O_5$ ) peroxy radical undergoing bimolecular reactions with other peroxy radicals ( $RO_2$ ).  
 193 The  $C_8H_{15}O_6$  (nominal mass 269) radical can propagate autoxidation forming  $C_8H_{15}O_8$   
 194 (nominal mass 301) radical (green arrow). It can also undergo Russell mechanism (RM:  $RO_2$   
 195 +  $R'O_2 \rightarrow ROH + R'-HC=O + O_2$ ) forming closed-shell  $O_5$  products.

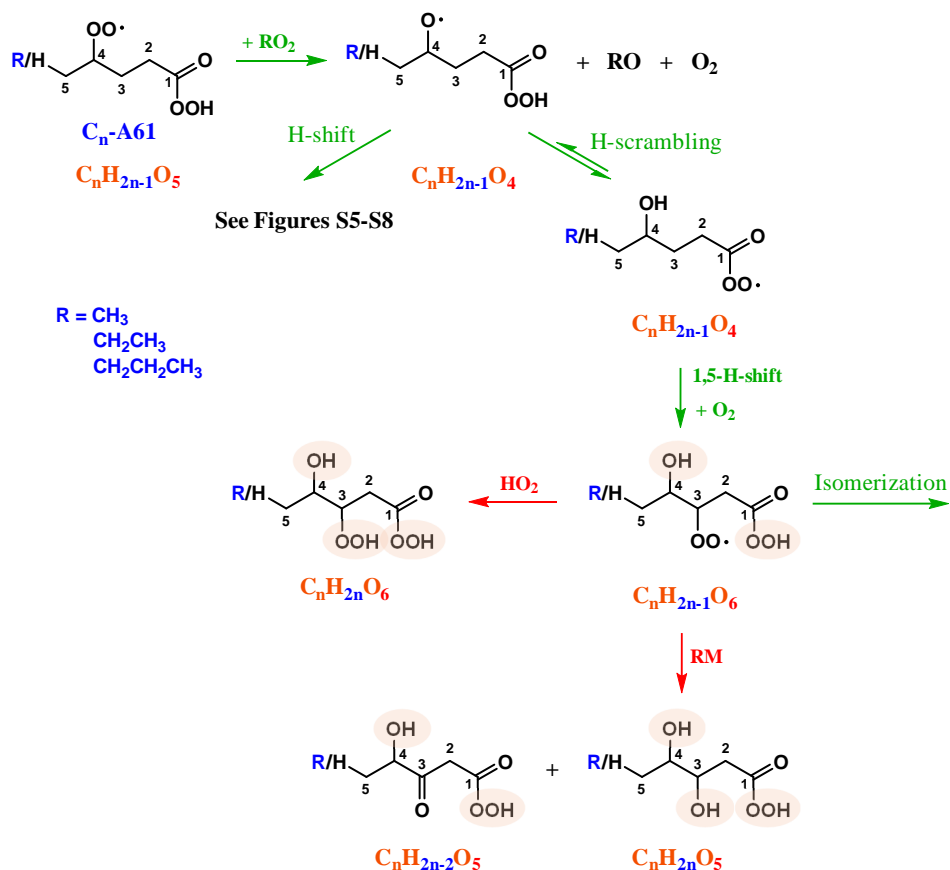

196

197 Figure S11. Formation of  $C_nH_{2n-1}O_6$  peroxy radical in  $n$ -aldehyde + OH reaction involving H-  
 198 scrambling reaction of an alkoxy radical intermediate  $C_nH_{2n-1}O_4$  originating from  $C_n$ -A61  
 199 ( $C_nH_{2n-1}O_5$ ) peroxy radical via bimolecular reactions with other peroxy radicals ( $RO_2$ ). The  $O_6$   
 200  $RO_2$  radical can propagate autoxidation via isomerization channel (green arrow). It can also  
 201 react with  $HO_2$  and undergo Russell mechanism (RM:  $RO_2 + R'O_2 \rightarrow ROH + R'-HC=O + O_2$ )  
 202 forming closed-shell  $O_6$  and  $O_5$  products, respectively.

### 203 S9. HOM accretion products ( $C_{2n}H_{4n-2}O_{9-11}$ )

204 In the OH initiated  $n$ -aldehyde oxidation experiments, we observed the formation of HOM  
 205 accretion products according to a general reaction  $RO_2 + R'O_2 \rightarrow ROOR' + O_2$  (Hasan et al.,  
 206 2020; Valiev et al., 2019; Bianchi et al., 2019). The reactions forming the accretion products  
 207 ( $C_{16}H_{30}O_{9-11}$ ) in octanal oxidation are shown in Figure S12 which involve self and cross

208 reactions of alkyl peroxy radicals ( $C_8H_{15}O_{5-7}$ ). Note that the molecular structures shown here  
 209 do not represent their exact spatial orientation but provide the number of available functional  
 210 groups. In the studied  $C_5$ – $C_8$   $n$ -aldehyde systems, the reactant  $RO_2$  radicals ( $C_nH_{2n-1}O_{5-7}$ ) with  
 211 same number of O atoms have identical number(s) of OH, OOH, and C(O)OOH groups  
 212 according to Figures S6–S11. The corresponding accretion products ( $C_{2n}H_{4n-2}O_{9-11}$ ) will have  
 213 an equivalent number of OH, OOH, and C(O)OOH groups as shown here for octanal, marked  
 214 in light-brown shapes (see Figure S12). These are in agreement with the  $D_2O$  mediated H to D  
 215 shifts (see Figure 7 in the main manuscript).

216

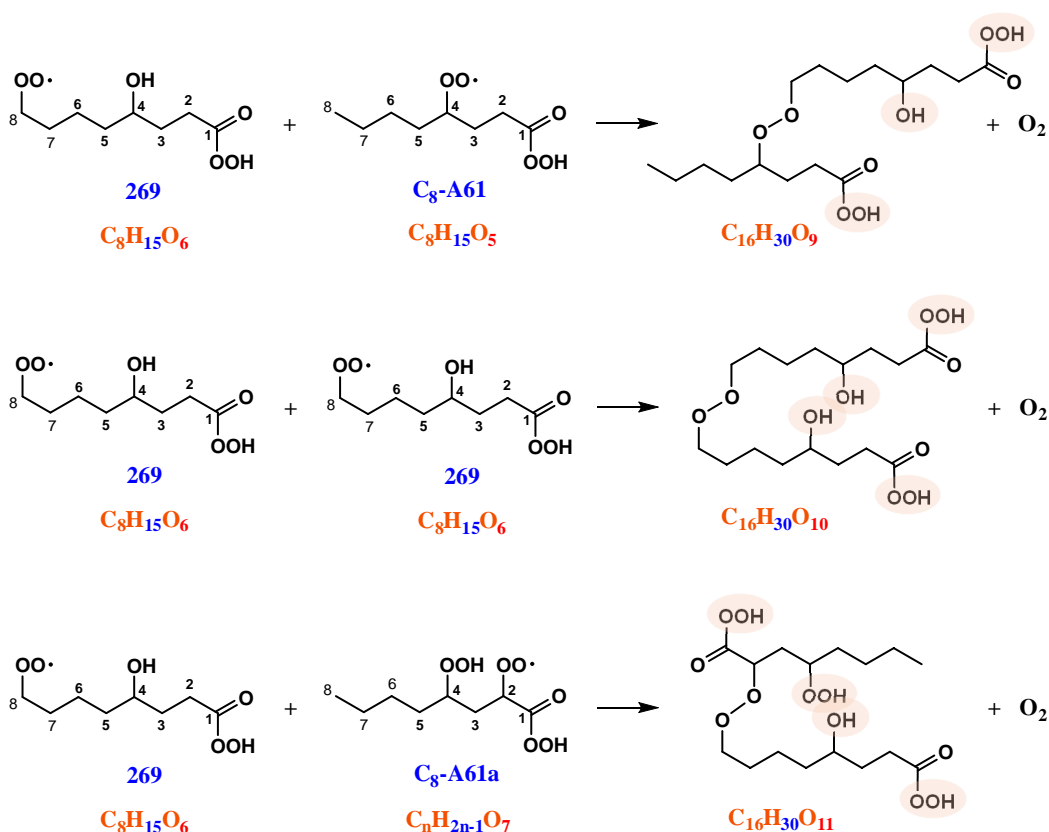

218 Figure S12. Formation of HOM accretion products ( $C_{16}H_{30}O_{9-11}$ ) in octanal + OH reaction via  
 219 alkyl peroxy self and cross reactions ( $RO_2 + R'O_2 \rightarrow ROOR' + O_2$ ). Similar reactions apply for  
 220 other  $n$ -aldehyde systems involving  $C_nH_{2n-1}O_{5-7}$   $RO_2$  radicals to produce corresponding  
 221 accretion products ( $C_{2n}H_{4n-2}O_{9-11}$ ) with equivalent number of OH, OOH, and C(O)OOH  
 222 groups.

## 223 S10. TME-derived accretion products

224 In our *n*-aldehyde oxidation experiments, the oxidant OH radicals were produced in situ by the  
225 ozonolysis reaction of tetramethylethylene (TME) (see Figure S13). The reaction leads to the  
226 formation of a keto peroxy radical ( $C_3H_5O_3$ ) and acetone ( $CH_3COCH_3$ ) along with OH radicals.  
227 The TME-derived peroxy radical  $C_3H_5O_3$  can react with aldehyde-derived peroxy radicals  
228  $C_nH_{2n-1}O_{6-8}$  and form different accretion products ( $C_{n+3}H_{2n+4}O_{7-9}$ ) as shown in Figure 3 in the  
229 main manuscript. One example of such reactions involving hexanal-derived peroxy radical  
230  $C_6H_{11}O_6$  is shown in Figure S13.

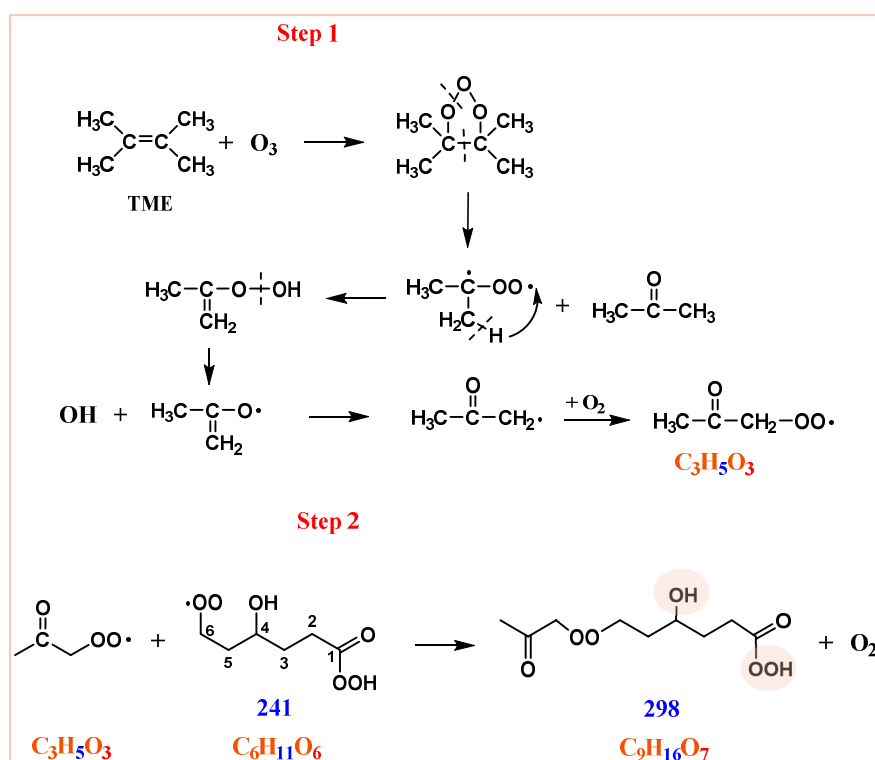

231

232 Figure S13. Production of oxidant OH in tetramethylethylene (TME) ozonolysis. The keto  
233 peroxy radical  $C_3H_5O_3$  is a biproduct and reacts with aldehyde-derived peroxy radicals  $C_n RO_2$   
234 yielding accretion products with  $C_{n+3}$  atoms; a pathway producing  $C_9H_{16}O_7$  accretion product  
235 in hexanal oxidation is shown as an example.

## 236 S11. $D_2O$ experiments

237 During the *n*-aldehyde OH oxidation experiments in presence of  $D_2O$ , a near complete H/D  
238 exchange was achieved which is most conveniently monitored from the reagent ions, from the  
239 shift of  $HNO_3NO_3^-$  and  $(HNO_3)_2NO_3^-$  signals by one and two mass unit, respectively on the  
240 mass spectrum (see Figure S14).

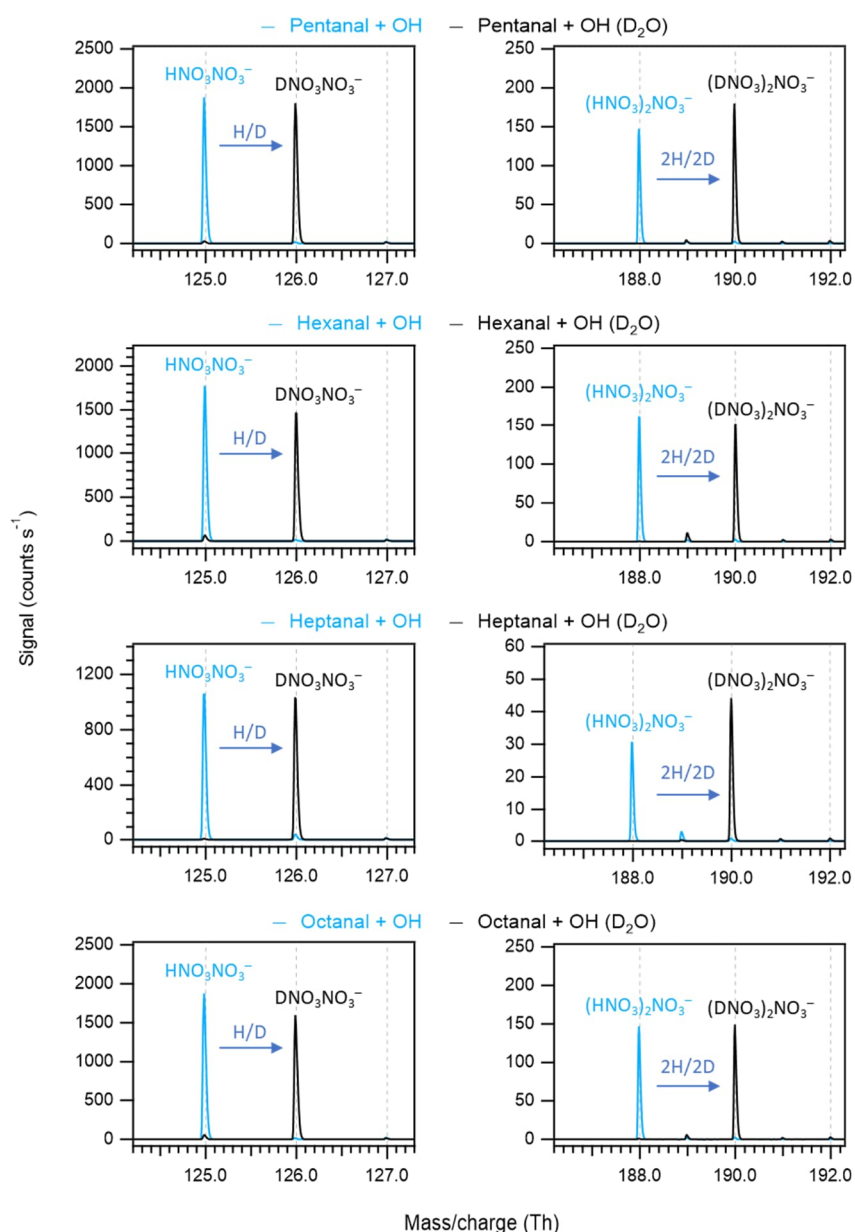

241

242 Figure S14. H/D exchange in the reagent ions  $\text{HNO}_3\text{NO}_3^-$  and  $(\text{HNO}_3)_2\text{NO}_3^-$  converting them  
 243 into  $\text{DNO}_3\text{NO}_3^-$  and  $(\text{DNO}_3)_2\text{NO}_3^-$ , respectively, during different  $n$ -aldehyde OH oxidation  
 244 reaction in presence of  $\text{D}_2\text{O}$ .

## 245 S12. Abundance of HOM in varying NO conditions

246 This section provides additional insights into the abundance of HOMs in  $n$ -aldehyde oxidation  
 247 experiments under varying average NO concentrations. Figure S15A shows that the intensities  
 248 of closed-shell product signals  $\text{C}_5\text{H}_8\text{O}_{4-6}$  somewhat increased at 1 ppb NO condition which  
 249 then started to decrease under higher NO of  $\sim 30$  ppb and above in pentanal oxidation. A similar  
 250 trend was observed with their corresponding yields as shown in Figure 6a in the main  
 251 manuscript. In both pentanal and hexanal oxidations, the dominant  $\text{O}_6$  peroxy radicals ( $\text{C}_5\text{H}_9\text{O}_6$

252 and  $C_6H_{11}O_6$  respectively, blue markers) seem to have retained their initial intensities under up  
 253 to  $\sim 30$  ppb of average NO (Figure S15 A–B).

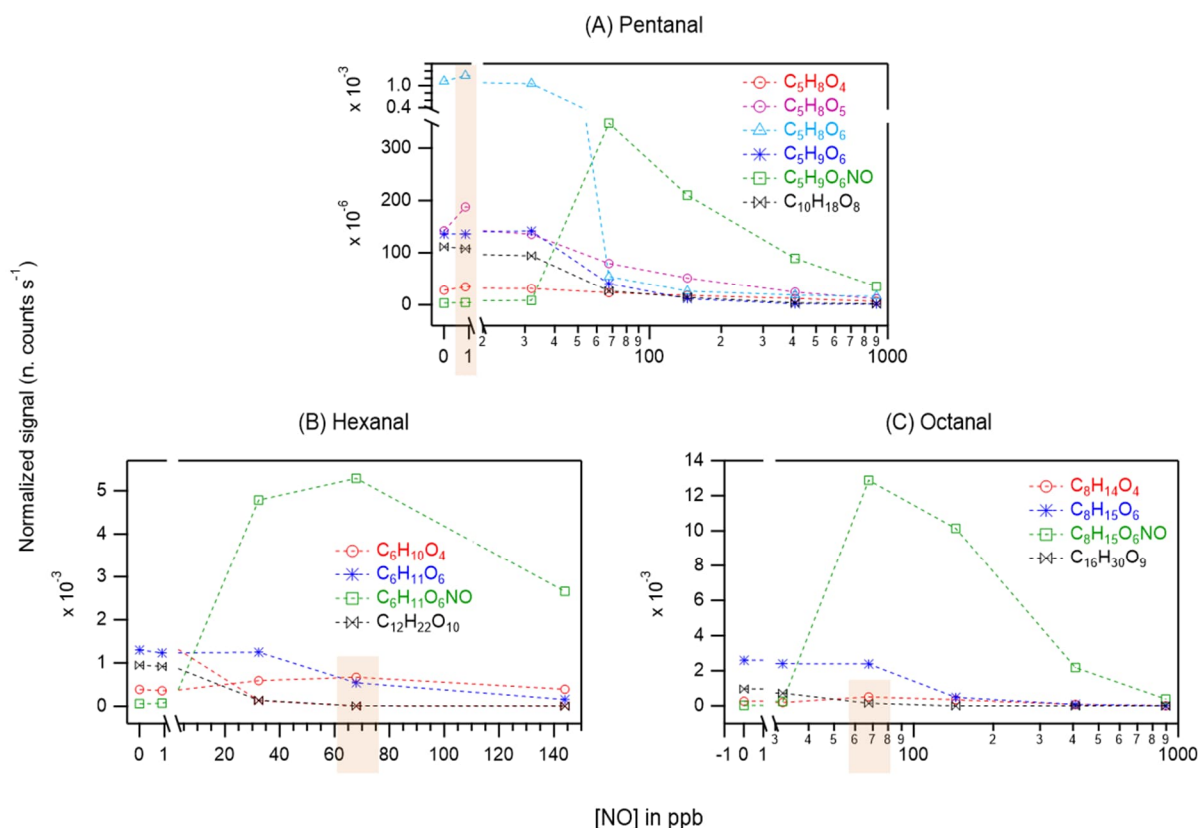

254  
 255 Figure S15. The response (in normalized counts  $s^{-1}$ ) of different oxidation product signals  
 256 including monomeric HOMs, organonitrates (green markers), and HOM accretion products  
 257 (black markers) as a function of average NO concentrations in OH initiated oxidation of *n*-  
 258 aldehydes: pentanal (A), hexanal (B), and octanal (C). Note the logarithmic scale (x-axis) in  
 259 panels A and C. The orange rectangles include the enhanced non-nitrogen containing product  
 260 signals:  $O_4$ – $O_6$  closed-shell products from pentanal at  $\sim 1$  ppb NO (A),  $O_4$  closed-shell products  
 261 from hexanal and octanal at  $\sim 70$  ppb NO (B and C). Reaction time,  $\Delta t = 11$ – $13$  s.

262 On the other hand, in octanal oxidation, the dominant  $O_6$  peroxy radical ( $C_8H_{15}O_6$ ) seems to  
 263 have maintained almost its initial level of signal intensity even under  $\sim 70$  ppb of NO (see Figure  
 264 S15C). Interestingly, the corresponding yields of the peroxy radicals increased under those NO  
 265 conditions (i.e.,  $\sim 30$  ppb average NO for pentanal and hexanal, and up to  $\sim 70$  ppb NO for  
 266 octanal; see Figure 6 in the main manuscript) compared to their yields under zero NO condition.  
 267 Although the abundance of the peroxy radicals did not increase with varying NO conditions,  
 268 their higher yields were because of the lower consumptions of corresponding precursor  
 269 aldehydes. Indeed, in the presence of NO, the reaction of the aldehyde with OH competes with

270 the NO + OH reaction, leading to lower aldehyde consumption (see Figure S17 in Section S13).  
271 In all the *n*-aldehydes studied, although the intensities of highly oxygenated products were  
272 suppressed under higher NO concentrations, we observed some enhancement in the early  
273 oxygenated closed shell products (O<sub>4</sub>–O<sub>5</sub>, and even O<sub>6</sub> product in pentanal) under relatively  
274 lower NO concentrations.

## 275 **S13. Kinetic simulation**

### 276 **S13.1 Simulations without and with NO**

277 Chemical kinetic simulations were carried out using Kinetiscope Program (Bunker et al., 1974;  
278 Gillespie, 1976; Hinsberg and Houle, 2022) to estimate the concentrations of oxidant OH and  
279 initial RO<sub>2</sub> radicals in different *n*-aldehyde oxidation reactions without (reaction steps 1–3, 8–  
280 10 below) and with the presence of NO (reaction steps 1–12 below). For the reactions of  
281 different *n*-aldehydes with OH radical, we used the rate coefficients of  $2.66 \times 10^{-11}$ ,  
282  $2.85 \times 10^{-11}$ , and  $3.0 \times 10^{-11}$  cm<sup>3</sup> molecule<sup>-1</sup> s<sup>-1</sup> for pentanal (PTL), hexanal (HXL), and  
283 octanal (OTL), respectively, reported by Mellouki et al. (2015). In our flow reactor setup, we  
284 produced OH radicals in situ by the ozonolysis reaction of tetramethyl ethylene (TME). The  
285 produced OH radicals react with TME as well as with the aldehyde in the flow reactor. In the  
286 simulations, we used reaction rate coefficients  $k_{TME-O_3}$  of  $1.5 \times 10^{-15}$  and  $k_{TME-OH}$  of  
287  $1.0 \times 10^{-10}$  cm<sup>3</sup> molecule<sup>-1</sup> s<sup>-1</sup> accounting for the reactions of TME with ozone and OH,  
288 respectively (Manion et al., 2015). The initial precursor concentrations of aldehyde, TME,  
289 ozone, and NO identical to the experimental conditions (see Table S1 below) were used. These  
290 include 1.3–2.5 ppm ( $6.15$ – $3.20 \times 10^{13}$  molecules cm<sup>-3</sup>) of pentanal, 1 ppm ( $2.46 \times 10^{13}$   
291 molecules cm<sup>-3</sup>) of hexanal, 0.72 ppm ( $1.77 \times 10^{13}$  molecules cm<sup>-3</sup>) of octanal, 43.2–48.2  
292 ppb ( $1.06$ – $1.19 \times 10^{12}$  molecules cm<sup>-3</sup>) of TME, and 208–295 ppb ( $5.12$ – $7.26 \times 10^{12}$   
293 molecules cm<sup>-3</sup>) of ozone. In the flow reactor experiments, high VOC concentrations were used  
294 to scavenge OH, especially as TME reacts so fast with it. Following the reaction of aldehyde  
295 with OH, the initially formed carbon centered radical readily undergoes a pseudo unimolecular  
296 reaction with O<sub>2</sub> to form the first RO<sub>2</sub> radical. For simplification, we show the formation of  
297 different RO<sub>2</sub> radicals directly from the reactions of aldehyde with OH, and TME with OH.  
298 Here, TME-produced RO<sub>2</sub> and aldehyde-produced RO<sub>2</sub> are separated by the expressions  
299 RO<sub>2</sub>\_T and RO<sub>2</sub>\_A, respectively.

300 With the addition of NO in the reaction system, it is expected to influence the concentrations  
301 of OH radicals and initial RO<sub>2</sub> radicals. Therefore, to simulate the experiments with NO, we

302 included the bimolecular reaction rate coefficients of  $k_{NO-OH} = 3.3 \times 10^{-11}$ ,  $k_{HONO-OH} =$   
 303  $6.0 \times 10^{-12}$ ,  $k_{NO-O_3} = 1.8 \times 10^{-14}$ , and  $k_{NO_2-OH} = 4.1 \times 10^{-11} \text{ cm}^3 \text{ molecule}^{-1} \text{ s}^{-1}$   
 304 (Atkinson et al., 2004), with respect to their corresponding reactions in the simulation. In  
 305 addition, bimolecular rate coefficients for  $RO_2 + RO_2$  and  $RO_2 + NO$  reactions were set to the  
 306 generic values of  $3.2 \times 10^{-11}$  and  $9.0 \times 10^{-12} \text{ cm}^3 \text{ molecule}^{-1} \text{ s}^{-1}$ , respectively (Berndt et  
 307 al., 2018; Jenkin et al., 2019) to account for sinks of  $RO_2$  radicals. The influences of  $NO +$   
 308  $HO_2$ ,  $RO_2 + HO_2$ , and  $RO_2 + NO_2$  reactions on  $OH$  and  $RO_2\_A$  radical concentrations were  
 309 examined separately and discussed in the section below. An example of the reaction steps used  
 310 in the current simulation is as follows. The results are shown in Figure S16 and Table S1.

- 311 1.  $TME + O_3 \Rightarrow OH$  ( $k_{TME-O_3} = 1.5 \times 10^{-15} \text{ cm}^3 \text{ molecule}^{-1} \text{ s}^{-1}$ )
- 312 2.  $TME + OH \Rightarrow RO_2\_T$  ( $k_{TME-OH} = 1.0 \times 10^{-10} \text{ cm}^3 \text{ molecule}^{-1} \text{ s}^{-1}$ )
- 313 3.  $OTL + OH \Rightarrow RO_2\_A$  ( $k_{OTL-OH} = 3.0 \times 10^{-11} \text{ cm}^3 \text{ molecule}^{-1} \text{ s}^{-1}$ )
- 314 4.  $NO + OH \Rightarrow HONO$  ( $k_{NO-OH} = 3.3 \times 10^{-11} \text{ cm}^3 \text{ molecule}^{-1} \text{ s}^{-1}$ )
- 315 5.  $HONO + OH \Rightarrow H_2O + NO_2$  ( $k_{HONO-OH} = 6.0 \times 10^{-12} \text{ cm}^3 \text{ molecule}^{-1} \text{ s}^{-1}$ )
- 316 6.  $NO + O_3 \Rightarrow NO_2 + O_2$  ( $k_{NO-O_3} = 1.8 \times 10^{-14} \text{ cm}^3 \text{ molecule}^{-1} \text{ s}^{-1}$ )
- 317 7.  $NO_2 + OH \Rightarrow HNO_3$  ( $k_{NO_2-OH} = 4.1 \times 10^{-11} \text{ cm}^3 \text{ molecule}^{-1} \text{ s}^{-1}$ )
- 318 8.  $2 RO_2\_T \Rightarrow \text{Sink\_a}$  ( $k_{RO_2-RO_2} = 3.2 \times 10^{-11} \text{ cm}^3 \text{ molecule}^{-1} \text{ s}^{-1}$ )
- 319 9.  $2 RO_2\_A \Rightarrow \text{Sink\_b}$  ( $k_{RO_2-RO_2} = 3.2 \times 10^{-11} \text{ cm}^3 \text{ molecule}^{-1} \text{ s}^{-1}$ )
- 320 10.  $RO_2\_T + RO_2\_A \Rightarrow \text{Sink\_ab}$  ( $k_{RO_2-RO_2} = 3.2 \times 10^{-11} \text{ cm}^3 \text{ molecule}^{-1} \text{ s}^{-1}$ )
- 321 11.  $RO_2\_T + NO \Rightarrow RONO_2$  ( $k_{RO_2-NO} = 9.0 \times 10^{-12} \text{ cm}^3 \text{ molecule}^{-1} \text{ s}^{-1}$ )
- 322 12.  $RO_2\_A + NO \Rightarrow RONO_2$  ( $k_{RO_2-NO} = 9.0 \times 10^{-12} \text{ cm}^3 \text{ molecule}^{-1} \text{ s}^{-1}$ )

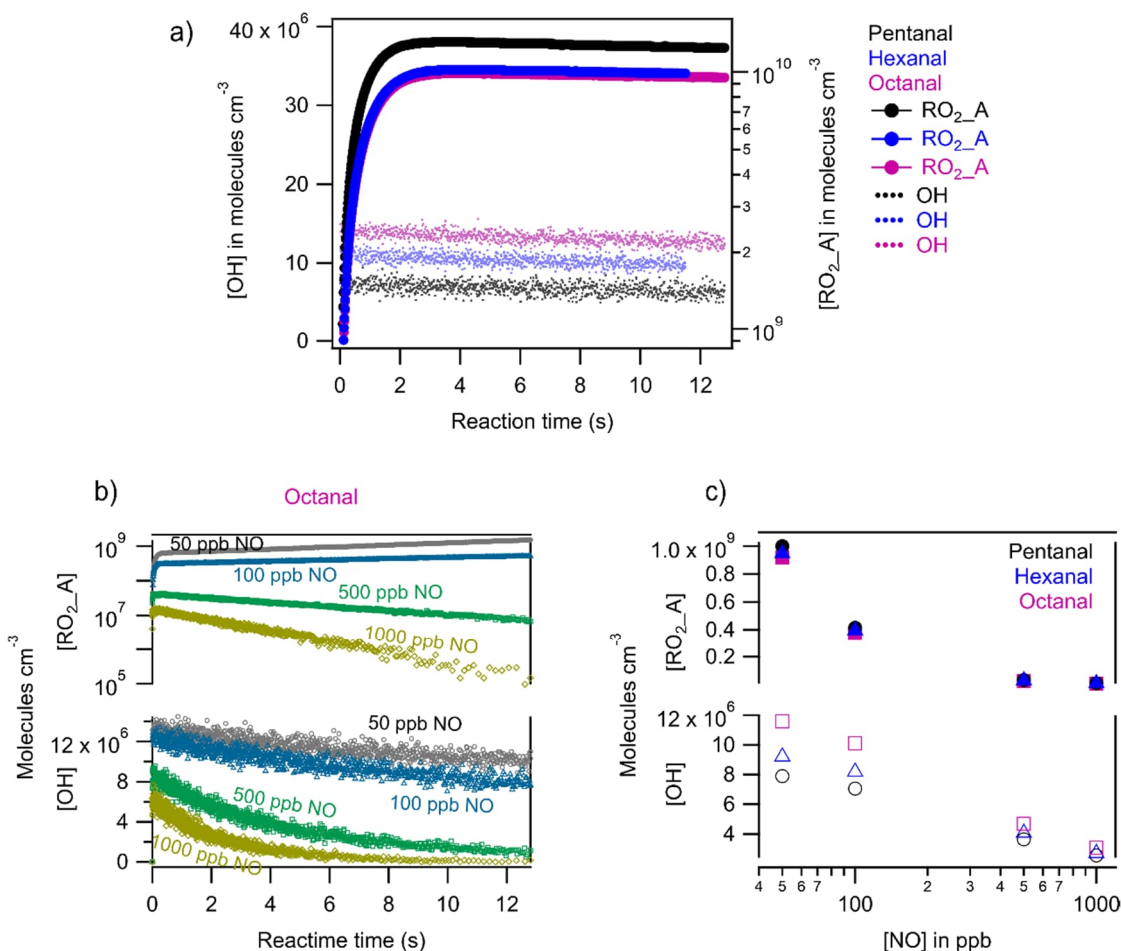

323

324 Figure S16. Concentration profiles of OH and initial RO<sub>2</sub>\_A radicals produced in *n*-aldehyde  
 325 oxidation derived by chemical kinetic simulations under laboratory flow reactor experimental  
 326 condition without NO (a) and with NO (b–c). Panel (b) shows results from octanal. In panel  
 327 (c), average concentrations of OH and RO<sub>2</sub>\_A radicals during 11–13 s reaction time are  
 328 presented in open and filled markers, respectively.

329 Figure S16a and Table S1 imply that the average concentrations of oxidant OH and initial  
 330 RO<sub>2</sub>\_A radicals in the flow reactor are comparable in different *n*-aldehyde oxidation  
 331 experiments. In the experiments without NO, the simulation produced average concentrations  
 332 of OH radicals are  $6.78 \times 10^6$ ,  $1.03 \times 10^7$ , and  $1.33 \times 10^7$  molecules cm<sup>-3</sup> for the  
 333 experiments with PTL, HXL, and OTL, respectively.

334 Table S1. Average concentrations of OH and initial RO<sub>2</sub> radicals and reacted precursor  
 335 aldehyde concentrations ( $\Delta$ VOC) in different *n*-aldehyde oxidation experiments derived from  
 336 kinetic simulations under laboratory conditions. Reaction time,  $\Delta t = 11$ – $13$  s.

| Expt.<br>type<br>(VOC)       | Model input   |               |                           |                             | Model output           |                           |                                           |
|------------------------------|---------------|---------------|---------------------------|-----------------------------|------------------------|---------------------------|-------------------------------------------|
|                              | [VOC]<br>ppmv | [TME]<br>ppbv | [O <sub>3</sub> ]<br>ppbv | [NO] <sub>t=0</sub><br>ppbv | $\Delta$ [VOC]<br>ppbv | [OH]<br>#/cm <sup>3</sup> | [RO <sub>2</sub> _A]<br>#/cm <sup>3</sup> |
| <b>Simulation without NO</b> |               |               |                           |                             |                        |                           |                                           |
| PTL                          | 2.5           | 48.2          | 295                       | –                           | 5.78                   | $6.78 \times 10^6$        | $1.21 \times 10^{10}$                     |
| HXL                          | 1.0           | 43.2          | 225                       | –                           | 3.39                   | $1.03 \times 10^7$        | $9.37 \times 10^9$                        |
| OTL                          | 0.72          | 48.2          | 208                       | –                           | 3.65                   | $1.33 \times 10^7$        | $9.12 \times 10^9$                        |
| <b>In the presence of NO</b> |               |               |                           |                             |                        |                           |                                           |
|                              |               |               |                           | 0                           | 3.91                   | $8.84 \times 10^6$        | $9.67 \times 10^9$                        |
|                              |               |               |                           | 50                          | 3.42                   | $7.90 \times 10^6$        | $1.00 \times 10^9$                        |
|                              |               |               |                           | 100                         | 2.98                   | $7.06 \times 10^6$        | $4.14 \times 10^8$                        |
| PTL                          | 1.3           | 48.2          | 208                       | 500                         | 1.09                   | $3.64 \times 10^6$        | $3.26 \times 10^7$                        |
|                              |               |               |                           | 1000                        | 0.43                   | $2.55 \times 10^6$        | $1.05 \times 10^7$                        |
|                              |               |               |                           | 50                          | 2.96                   | $9.22 \times 10^6$        | $9.49 \times 10^8$                        |
|                              |               |               |                           | 100                         | 2.58                   | $8.20 \times 10^6$        | $3.96 \times 10^8$                        |
| HXL                          | 1.0           | 43.2          | 225                       | 500                         | 0.98                   | $4.09 \times 10^6$        | $3.06 \times 10^7$                        |
|                              |               |               |                           | 1000                        | 0.38                   | $2.72 \times 10^6$        | $9.34 \times 10^6$                        |
|                              |               |               |                           | 50                          | 3.12                   | $1.16 \times 10^7$        | $9.18 \times 10^8$                        |
|                              |               |               |                           | 100                         | 2.67                   | $1.01 \times 10^7$        | $3.71 \times 10^8$                        |
| OTL                          | 0.72          | 48.2          | 208                       | 500                         | 0.88                   | $4.70 \times 10^6$        | $2.64 \times 10^7$                        |
|                              |               |               |                           | 1000                        | 0.33                   | $3.09 \times 10^6$        | $7.98 \times 10^6$                        |

337 The corresponding estimated RO<sub>2</sub>\_A radical concentrations are  $1.21 \times 10^{10}$ ,  $9.37 \times 10^9$ , and  
 338  $9.12 \times 10^9$  molecules cm<sup>-3</sup>, respectively. While the average OH concentrations for HXL and  
 339 OTL experiments are closer to each other, it is somewhat lower for the PTL experiment by a  
 340 factor of 1.5 to 2 despite having higher initial ozone concentration. This can be attributed to  
 341 the OH radical consumption by higher precursor PTL concentration compared to that of HXL  
 342 and OTL. It is reflected in the concentrations of initial RO<sub>2</sub>\_A radicals in the three studied  
 343 systems which are rather comparable and we aim for this as the starting condition for  
 344 autoxidation. Note the sequential increase in reaction rate coefficients of aldehydes (from PTL  
 345 to OTL) with OH radical mentioned above. In the presence of NO, Figure S16b shows how the  
 346 concentration profiles of OH and RO<sub>2</sub>\_A radicals evolve in time with OTL oxidation  
 347 experiment as an example. In all the *n*-aldehyde systems studied, the primary RO<sub>2</sub>\_A radical  
 348 concentration steadily increases with time under 50 ppb and 100 ppb initial NO conditions.  
 349 However, at 500 ppb and 1000 ppb NO conditions, the concentrations of RO<sub>2</sub>\_A radicals  
 350 decrease with time soon after achieving their initial peak values. In the case of OH radicals, the

351 concentrations show a general decreasing trend with time while at higher NO conditions (from  
352 500 ppb initial NO), we observe a faster decreasing tendency in concentrations as expected. It  
353 is also rewarding to see that the initial RO<sub>2</sub>\_A radical concentrations from the studied *n*-  
354 aldehydes are comparable under various NO conditions (see Figure S16c and Table S1).  
355 Furthermore, it is important to mention that the concentrations of oxidant OH and primary  
356 RO<sub>2</sub>\_A radicals reported here are at their upper limits as the loss of the radicals to the reactor  
357 wall is not accounted. Therefore, in our flow reactor experiments, the concentrations of the  
358 reactive radical species are close to the expected concentrations in the ambient air, and we  
359 believe they are well representative.

360 Under higher initial NO conditions, OH radical concentrations are depleted predominantly via  
361 its reaction with NO (reaction step 4) as well as via the drop of reactant ozone (reaction step 6)  
362 concentrations. Figure S17 shows the time series of NO, O<sub>3</sub>, and precursor aldehyde  
363 concentrations estimated by the simulations. A faster drop of ozone concentrations is seen  
364 under higher initial NO concentrations of 500 ppb and above compared to lower NO  
365 concentrations (panels a, c and e of Figure S17). This is reflected in the estimated OH  
366 concentrations (Figure S16c and Table S1) as well as in the consumption of precursor aldehydes  
367 (see panels b, d and f of Figure S17, and  $\Delta$ VOC in Table S1).

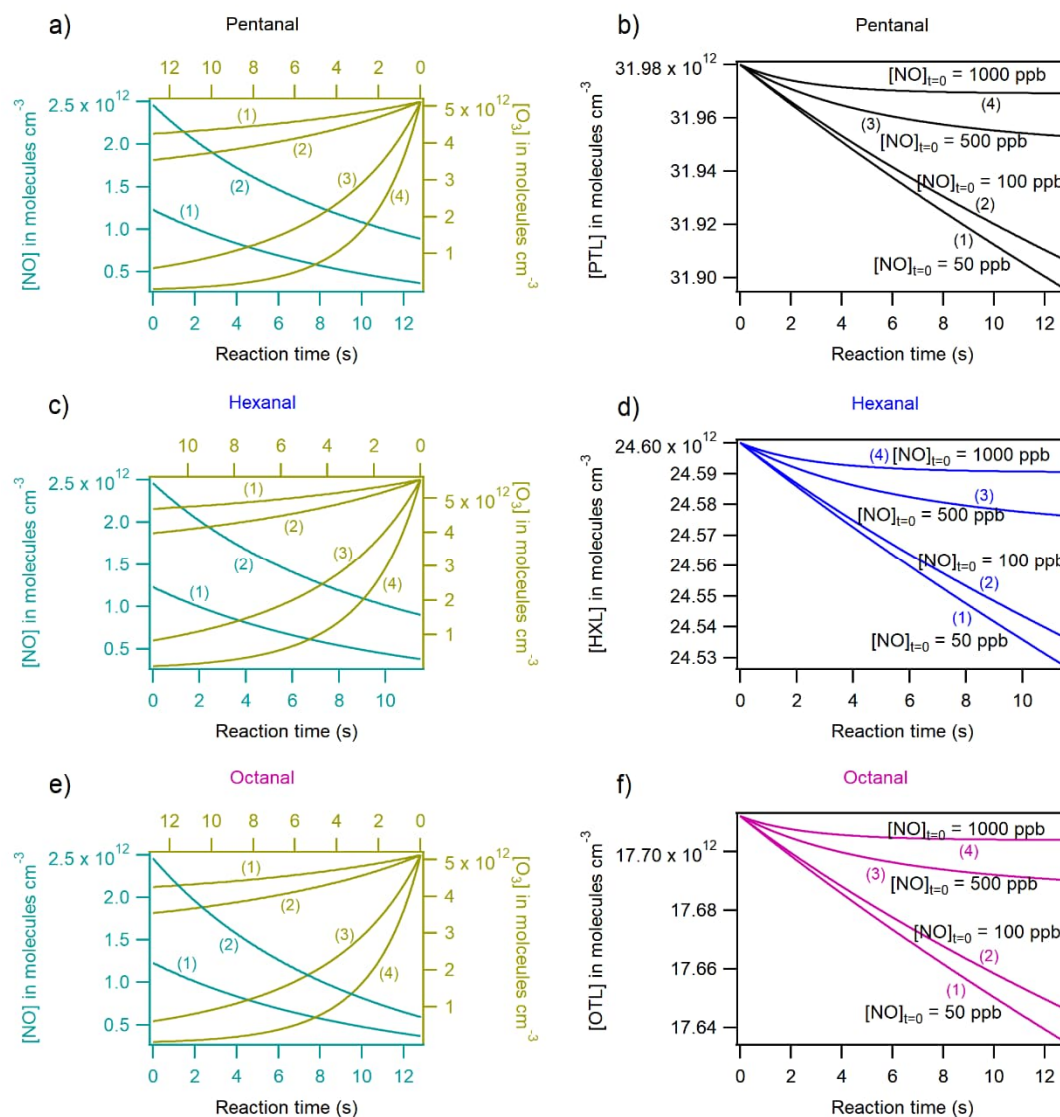

368

369 Figure S17. Concentration profiles of NO, O<sub>3</sub>, and *n*-aldehyde as a function of reaction time  
 370 under different initial [NO]<sub>t=0</sub> conditions: pentanal (a–b), hexanal (c–d), and octanal (e–f). The  
 371 initial NO conditions are marked with numbers within parenthesis: [NO]<sub>t=0</sub> = 50 ppb (1),  
 372 [NO]<sub>t=0</sub> = 100 ppb (2), [NO]<sub>t=0</sub> = 500 ppb (3), and [NO]<sub>t=0</sub> = 1000 ppb (4). Reaction time, Δ*t* =  
 373 11–13 s. PTL = pentanal, HXL = hexanal, and OTL = octanal.

### 374 S13.2 Impact of HO<sub>2</sub> on OH and RO<sub>2</sub>

375 In the gas-phase oxidation process of volatile organic compounds (VOCs), it is usual to produce  
 376 hydroperoxy radicals (HO<sub>2</sub>) alongside the production of alkyl peroxy radicals (RO<sub>2</sub>). In the  
 377 presence of NO, the HO<sub>2</sub> radicals react with NO to recycle OH and NO<sub>2</sub> radicals in the reaction  
 378 system (see reaction step 13) (Atkinson et al., 2004). In addition, the reaction of HO<sub>2</sub> with RO<sub>2</sub>  
 379 can produce closed shell hydroperoxide (ROOH) along with other products (Boyd et al., 2003).

380 Here, we included these reactions as other sinks of RO<sub>2</sub> in the simulation (reaction steps 14–  
 381 15).

382 13. HO<sub>2</sub> + NO => OH + NO<sub>2</sub> ( $k_{HO_2-NO} = 8.91 \times 10^{-12} \text{ cm}^3 \text{ molecule}^{-1} \text{ s}^{-1}$ )

383 14. RO<sub>2\_T</sub> + HO<sub>2</sub> => Sink\_c ( $k_{RO_2-HO_2} = 2.2 \times 10^{-11} \text{ cm}^3 \text{ molecule}^{-1} \text{ s}^{-1}$ )

384 15. RO<sub>2\_A</sub> + HO<sub>2</sub> => Sink\_d ( $k_{RO_2-HO_2} = 2.2 \times 10^{-11} \text{ cm}^3 \text{ molecule}^{-1} \text{ s}^{-1}$ )

385 In the flow reactor system, we presume that the production of HO<sub>2</sub> radicals is about 30% of  
 386 total RO<sub>2</sub> radicals (RO<sub>2\_T</sub> + RO<sub>2\_A</sub>) during the reaction time. Therefore, to examine the  
 387 influence of the HO<sub>2</sub> reactions with NO and RO<sub>2</sub> on the concentrations of OH and RO<sub>2\_A</sub>  
 388 radicals, we ran a separate set of simulations on Kinetiscope including the reaction steps 13–  
 389 15. An initial HO<sub>2</sub> concentration of 30% of total RO<sub>2</sub> (e.g.,  $1.35 \times 10^8 \text{ molecules cm}^{-3}$  of HO<sub>2</sub>  
 390 in OTL oxidation at 100 ppb initial NO condition) obtained from the previous simulation  
 391 without HO<sub>2</sub> was used in the subsequent simulation. Figure S18 shows the results of HXL and  
 392 OTL oxidation processes without and with involving the reaction steps 13–15. In all *n*-aldehyde  
 393 simulations, the reaction steps 13–15 do not seem to alter the average concentrations of OH  
 394 and RO<sub>2\_A</sub> radicals given that the reaction scheme (reaction steps 1–15) is lacking a constant  
 395 source of 30% HO<sub>2</sub>. To examine the maximum possible OH recycling from the reaction step  
 396 13, we also conducted another set of simulations by excluding reaction steps 14–15. Again, this  
 397 approach reproduced the same levels of average OH and RO<sub>2\_A</sub> concentrations highlighting  
 398 that the OH radical recycling under the studied NO conditions are not likely significant.

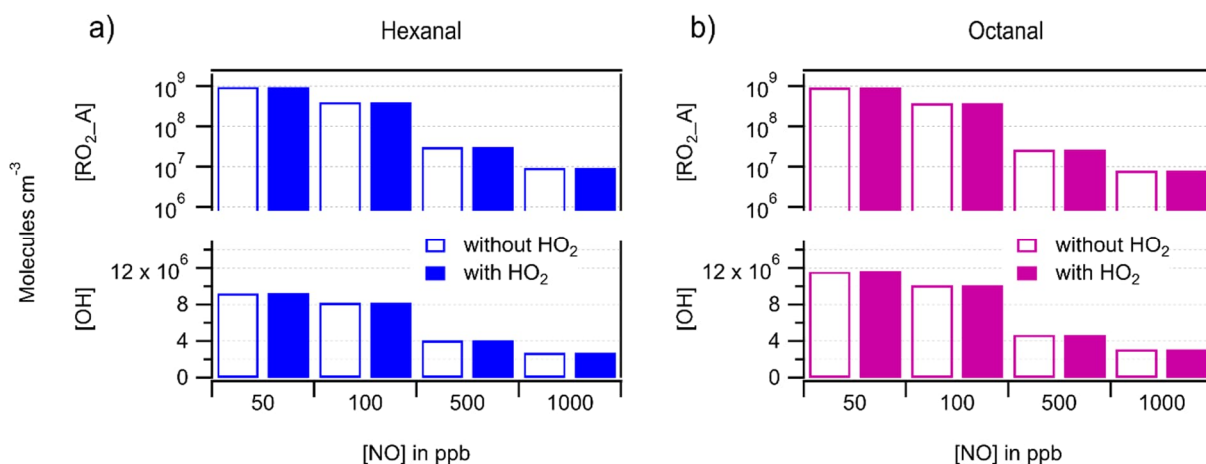

399  
 400 Figure S18. Average concentrations of OH and initial RO<sub>2\_A</sub> radicals produced in hexanal (a)  
 401 and octanal (b) oxidation derived by chemical kinetic simulations under laboratory conditions  
 402 with varying initial NO. Simulations that include the reactions of HO<sub>2</sub> with NO and RO<sub>2</sub>

403 (reaction steps 13–15) are presented in filled bars while simulations without these reaction  
404 steps are presented in open bars.

## 405 **References**

- 406 Atkinson, R., Baulch, D. L., Cox, R. A., Crowley, J. N., Hampson, R. F., Hynes, R. G.,  
407 Jenkin, M. E., Rossi, M. J., & Troe, J. (2004). Evaluated kinetic and photochemical  
408 data for atmospheric chemistry: Volume I - gas phase reactions of O<sub>x</sub>, HO<sub>x</sub>, NO<sub>x</sub> and  
409 SO<sub>x</sub> species. *Atmospheric Chemistry and Physics*, 4(6), 1461–1738.  
410 <https://doi.org/10.5194/acp-4-1461-2004>
- 411 Barua, S., Iyer, S., Kumar, A., Seal, P., & Rissanen, M. (2023). An aldehyde as a rapid source  
412 of secondary aerosol precursors: Theoretical and experimental study of hexanal  
413 autoxidation. *Atmospheric Chemistry and Physics*, 23(18), 10517–10532.  
414 <https://doi.org/10.5194/acp-23-10517-2023>
- 415 Berndt, T., Scholz, W., Mentler, B., Fischer, L., Herrmann, H., Kulmala, M., & Hansel, A.  
416 (2018). Accretion Product Formation from Self- and Cross-Reactions of RO<sub>2</sub> Radicals  
417 in the Atmosphere. *Angewandte Chemie International Edition*, 57(14), 3820–3824.  
418 <https://doi.org/10.1002/anie.201710989>
- 419 Bianchi, F., Kurtén, T., Riva, M., Mohr, C., Rissanen, M. P., Roldin, P., Berndt, T., Crouse, J.  
420 D., Wennberg, P. O., Mentel, T. F., Wildt, J., Junninen, H., Jokinen, T., Kulmala, M.,  
421 Worsnop, D. R., Thornton, J. A., Donahue, N., Kjaergaard, H. G., & Ehn, M. (2019).  
422 Highly Oxygenated Organic Molecules (HOM) from Gas-Phase Autoxidation  
423 Involving Peroxy Radicals: A Key Contributor to Atmospheric Aerosol. *Chemical*  
424 *Reviews*, 119(6), 3472–3509. <https://doi.org/10.1021/acs.chemrev.8b00395>
- 425 Boyd, A. A., Flaud, P.-M., Daugey, N., & Lesclaux, R. (2003). Rate Constants for RO<sub>2</sub> + HO<sub>2</sub>  
426 Reactions Measured under a Large Excess of HO<sub>2</sub>. *The Journal of Physical Chemistry*  
427 *A*, 107(6), 818–821. <https://doi.org/10.1021/jp026581r>

428 Bunker, D. L., Garrett, B., Kleindienst, T., & Long, G. S. (1974). Discrete simulation  
429 methods in combustion kinetics. *Combustion and Flame*, 23(3), 373–379.  
430 [https://doi.org/10.1016/0010-2180\(74\)90120-5](https://doi.org/10.1016/0010-2180(74)90120-5)

431 Gillespie, D. T. (1976). A general method for numerically simulating the stochastic time  
432 evolution of coupled chemical reactions. *Journal of Computational Physics*, 22(4),  
433 403–434. [https://doi.org/10.1016/0021-9991\(76\)90041-3](https://doi.org/10.1016/0021-9991(76)90041-3)

434 Hasan, G., Salo, V.-T., Valiev, R. R., Kubečka, J., & Kurtén, T. (2020). Comparing Reaction  
435 Routes for<sup>3</sup> (RO···OR') Intermediates Formed in Peroxy Radical Self- and Cross-  
436 Reactions. *The Journal of Physical Chemistry A*, 124(40), 8305–8320.  
437 <https://doi.org/10.1021/acs.jpca.0c05960>

438 Hinsberg, W., & Houle, F. (2022). *Kinetiscope: A stochastic kinetics simulator*,  
439 <http://hinsberg.net/kinetiscope> (last access: 06 Nov 2023).

440 Jenkin, M. E., Valorso, R., Aumont, B., & Rickard, A. R. (2019). Estimation of rate  
441 coefficients and branching ratios for reactions of organic peroxy radicals for use in  
442 automated mechanism construction. *Atmospheric Chemistry and Physics*, 19(11),  
443 7691–7717. <https://doi.org/10.5194/acp-19-7691-2019>

444 Kürten, A., Rondo, L., Ehrhart, S., & Curtius, J. (2012). Calibration of a Chemical Ionization  
445 Mass Spectrometer for the Measurement of Gaseous Sulfuric Acid. *The Journal of*  
446 *Physical Chemistry A*, 116(24), 6375–6386. <https://doi.org/10.1021/jp212123n>

447 Manion, J. A., Huie, R. E., Levin, R. D., Burgess Jr, D. R., Orkin, V. L., Tsang, W.,  
448 McGivern, W. S., Hudgens, J. W., Knyazev, V. D., Atkinson, D. B., Chai, E., Tereza,  
449 A. M., Lin, C.-Y., Allison, T. C., Mallard, W. G., Westley, F., Herron, J. T., Hampson,  
450 R. F., & Frizzell, D. H. (2015). *NIST Chemical Kinetics Database, NIST Standard*  
451 *Reference Database 17, version 7.0 (web version), release 1.6.8, data version*

452 2015.09, National Institute of Standards and Technology, MD.  
453 <https://kinetics.nist.gov/>  
454 Mellouki, A., Wallington, T. J., & Chen, J. (2015). Atmospheric Chemistry of Oxygenated  
455 Volatile Organic Compounds: Impacts on Air Quality and Climate. *Chemical Reviews*,  
456 115(10), 3984–4014. <https://doi.org/10.1021/cr500549n>  
457 Valiev, R. R., Hasan, G., Salo, V.-T., Kubečka, J., & Kurten, T. (2019). Intersystem Crossings  
458 Drive Atmospheric Gas-Phase Dimer Formation. *The Journal of Physical Chemistry*  
459 *A*, 123(30), 6596–6604. <https://doi.org/10.1021/acs.jpca.9b02559>  
460 Vereecken, L., & Peeters, J. (2010). A structure–activity relationship for the rate coefficient of  
461 H-migration in substituted alkoxy radicals. *Physical Chemistry Chemical Physics*,  
462 12(39), 12608. <https://doi.org/10.1039/c0cp00387e>  
463 Yang, X., Wang, H., Lu, K., Ma, X., Tan, Z., Long, B., Chen, X., Li, C., Zhai, T., Li, Y., Qu,  
464 K., Xia, Y., Zhang, Y., Li, X., Chen, S., Dong, H., Zeng, L., & Zhang, Y. (2024).  
465 Reactive aldehyde chemistry explains the missing source of hydroxyl radicals. *Nature*  
466 *Communications*, 15(1), 1648. <https://doi.org/10.1038/s41467-024-45885-w>  
467
